# Supplementary material for: LIX1 regulates YAP1 activity and controls the proliferation and differentiation of stomach mesenchymal progenitors
Source: BMC Biol. 2016 Apr 28;14:34. doi: 10.1186/s12915-016-0257-2 (PMC4848777; doi:10.1186/s12915-016-0257-2)
Supplement: Additional file 12. — Supporting data. (XLSX 46 kb) [file 12915_2016_257_MOESM12_ESM.xlsx]

## Sheet: Figure 5B
LIX1		aSMA
Control E5.5	FGF8 E5.5	Control E5.5	FGF8 E5.5
0.781642	0.661153	1.1884	0.668411
1.32754	0.526278	0.811599	0.518526
0.902274	0.65279	1.32625	0.408627
1.06515		0.673753
SM22		YAP1
Control E5.5	FGF8 E5.5	Control E5.5	FGF8 E5.5
1.26725	0.42952	0.985761	0.743691
0.821831	0.406131	1.01424	0.585135
1.36264	0.357491	1.18186	0.514725
0.758243		0.818138
Figure 5B - Fold change in normalized gene expression

## Sheet: Figure 6D
YAP
Control E7	LIX1 E7
0.976556	2.63985
1.50974	1.29278
0.346675	5.85348
1.16703	26.8123
Figure 6D - Fold change in normalized protein expression

## Sheet: Figure 7B
YAP1		CTGF		CYR61
Control Day 1	LIX1 Day 1	Control Day 1	LIX1 Day 1	Control Day 1	LIX1 Day 1
1	4.87844	1	2.52579	1	1.62816
1	3.77908	1	1.87045	1	1.43948
1.15343	1.23665	1.09395	1.90081	1.08115	1.43655
0.963244	1.37207	1.08604	1.90471	0.960272	1.47377
1.02522	1.20806	0.983442	1.64997	1.07632	1.44678
Figure 7B - Fold change in normalized gene expression

## Sheet: Figure 7C
YAP
Control Day 1	LIX1 Day1
1	2.94779
0.947721	1.94884
1.05228	1.35324
	1.14529
Figure 7C - Fold change in normalized protein expression

## Sheet: Figure 7J
YAP1		CTGF		CYR61
Control Day 1	LIX1 Day 1	Control Day 1	LIX1 Day 1	Control Day 1	LIX1 Day 1
1	1.13577	1	0.829241	1	0.927817
1	2.36829	1	1.05373	1	1.39474
Figure 7J - Fold change in normalized gene expression

## Sheet: Figure 7K
pYAP/YAP
Control E7	LIX1 E7
0.98571	0.948832
1.01429	1.65762
Figure 7K - Fold change in normalized protein expression

## Sheet: Figure S4C
SHH			BARX1			LIX1
TOTAL	EPITHELIUM	MESENCHYME	TOTAL	EPITHELIUM	MESENCHYME	TOTAL	EPITHELIUM	MESENCHYME
0.0124555	0.0541772	0.000304144	0.083171	0.0207642	0.0800511	0.0207375	0.003123	0.0197797
0.00635676	0.030858	0.000338218	0.0552366	0.00791296	0.0640639	0.0108677	0.00361081	0.0153765
0.00965217	0.030032	0.000475088	0.0850982	0.0262622	0.0782091	0.0182201	0.00291674	0.010948
YAP1			CYR61			CTGF
TOTAL	EPITHELIUM	MESENCHYME	TOTAL	EPITHELIUM	MESENCHYME	TOTAL	EPITHELIUM	MESENCHYME
0.0991406	0.0550637	0.0783887	0.0662919	0.015306	0.0257422	0.018056	0.0127274	0.0299832
0.0801759	0.0657057	0.0815224	0.062724	0.0618545	0.0601079	0.0199161	0.018742	0.0324301
0.108083	0.045081	0.0757149	0.0625004	0.0362737	0.0402933	0.0236843	0.0145628	0.0335706
Supplementary Figure 4C - Fold change in normalized gene expression

## Sheet: Figure S6
CALPONIN		CALDESMON
Control E8.5	LIX1 E8.5	Control E8.5	LIX1 E8.5
1.15518	0.516196	1.06397	1.10534
0.896548	0.713997	0.951199	0.784267
0.974059	0.677557	0.583844	0.63424
1.02594	0.448132	1.42539	0.547056
	0.560885		0.228323
Supplementary Figure 6 - Fold change in normalized gene expression

## Sheet: Figure S8A
YAP1		CTGF		CYR61
Control High Density	LIX1 High Density	Control High Density	LIX1 High Density	Control High Density	LIX1 High Density
0.845074	0.818486	0.856325	0.897229	0.925409	0.953658
1.15493	1.02891	1.03269	0.872736	1.04973	0.961493
Supplementary Figure S8A - Fold change in normalized gene expression
