# Supplementary material for: LIX1 regulates YAP1 activity and controls the proliferation and differentiation of stomach mesenchymal progenitors
Source: Springer Nature journal article supplement (doi:10.1186/s12915-016-0257-2), 2016-04-28
Supplement: MOESM4 [file 12915_2016_257_MOESM4_ESM.pdf]

**Table S1 Phenotype quantification**

| Experiments                         | Phenotypes              | Embryos analysed | Embryos with phenotype | Phenotype % |
|-------------------------------------|-------------------------|------------------|------------------------|-------------|
| <b><i>LIX1</i> loss-of-function</b> |                         |                  |                        |             |
| E4.5 <i>LIX1</i> ISH                | Down-regulation         | 36               | 22                     | 61          |
| E6.5 <i>SM22</i> ISH                | Smaller domain          | 23               | 14                     | 60.87       |
| E7 PH3 IS                           | Less PH3-positive cells | 12               | 11                     | 91.67       |
| <b><i>LIX1</i> gain-of-function</b> |                         |                  |                        |             |
| E4.5 <i>SM22</i> ISH                | Early expression        | 16               | 11                     | 68.75       |
| E6.5 <i>SM22</i> ISH                | Expanded domain         | 30               | 17                     | 57          |
| E6.5 <i>BAPX1</i> ISH               | Expanded domain         | 13               | 9                      | 69          |
| E6.5 <i>SOX10</i> ISH               | Ectopic staining        | 20               | 12                     | 60          |
| E6 PH3 IS                           | More PH3-positive cells | 15               | 15                     | 100         |
| E7 PH3 IS                           | Less PH3-positive cells | 16               | 16                     | 100         |

ISH, in situ hybridization ; IS, immunostaining.
