# Supplementary material for: LIX1 regulates YAP1 activity and controls the proliferation and differentiation of stomach mesenchymal progenitors
Source: Springer Nature journal article supplement (doi:10.1186/s12915-016-0257-2), 2016-04-28
Supplement: MOESM11 [file 12915_2016_257_MOESM11_ESM.pdf]

**Table S2 Gene-specific chick primers used for RT-qPCR.**

| <b>Targets</b>                       | <b>Forward primer (5'-3')</b> | <b>Reverse primer (5'-3')</b>    | <b>Amplicon (bp)</b> |
|--------------------------------------|-------------------------------|----------------------------------|----------------------|
| <i><b><math>\alpha</math>SMA</b></i> | CTG TAT GCT TCT GGG CG        | GCA GTG GTC ACA AAG GAG          | 188                  |
| <i><b>BARX1</b></i>                  | CCG CTA CCG CAG TTT CA        | GCT CCG CCT TCA GAA CG           | 152                  |
| <i><b>CALDESMON</b></i>              | GAA ACA CGC CAA GGA CG        | CTT CCA GCA TAG CAT TTG TAT CATC | 258                  |
| <i><b>CALPONIN</b></i>               | GAC GAA GGG CAA CAA CG        | CAA GGG CTG GTC TGT CC           | 202                  |
| <i><b>CTGF</b></i>                   | GGA GAA GCA GAG CAG ACT       | GCA GAC ACC ACA GAA CTT AG       | 172                  |
| <i><b>CYR61</b></i>                  | TGA TTG CCA TCG TGA AGG G     | GGG ATT GTC GTT GGT GAC T        | 167                  |
| <i><b>GAPDH</b></i>                  | CGT CCT CTC TGG CAA AG        | TCA CGC TCC TGG AAG ATA G        | 177                  |
| <i><b>LIX1</b></i>                   | ATT GTC TTT CAG CTT CTG CAT   | TGC TCC TTC ATA ATC CAG TCC      | 152                  |
| <i><b>MYOCD</b></i>                  | CTT CTG TCA GCA ACA CCC       | AAG ACT GCG ACT GGT AAC          | 300                  |
| <i><b>SM22</b></i>                   | TGA GCA GGG ATG TCC AGT       | AGC CAA TGA TGT TCT TGC C        | 500                  |
| <i><b>SRF</b></i>                    | CAG GCA CCA CAG CAA AC        | CAG CCG AGA CTG GGA TT           | 328                  |
| <i><b>TEAD1</b></i>                  | CTCAGGCTGGTGGAGTT             | GTCGCTGTAAGAATGGTTTGC            | 108                  |
| <i><b>TEAD4</b></i>                  | ACCCTATGCTCTACAGCC            | CAACCCTTCGTCCTTGC                | 101                  |
| <i><b>UBIQUITIN</b></i>              | GGG ATG CAG ATC TTC GTG AAA   | CTT GCC AGC AAA GAT CAA CCT T    | 147                  |
| <i><b>YAP1</b></i>                   | CCA GAG ATG AAA GCA CAG ATA G | GCT TCA AGG TAG TCT GGG AAT      | 163                  |
